# Supplementary material for: A strategy to design protein-based antagonists against type I cytokine receptors
Source: PubMed Central journal article supplement (PMC11596305; doi:10.1371/journal.pbio.3002883), 2024-11-26

Fig N in S1 Text

Cropped image

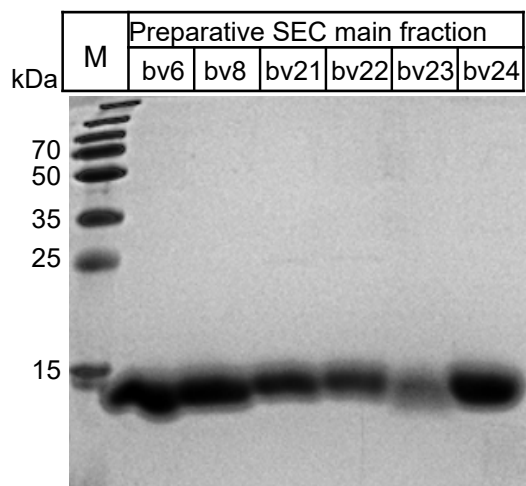

Uncropped image

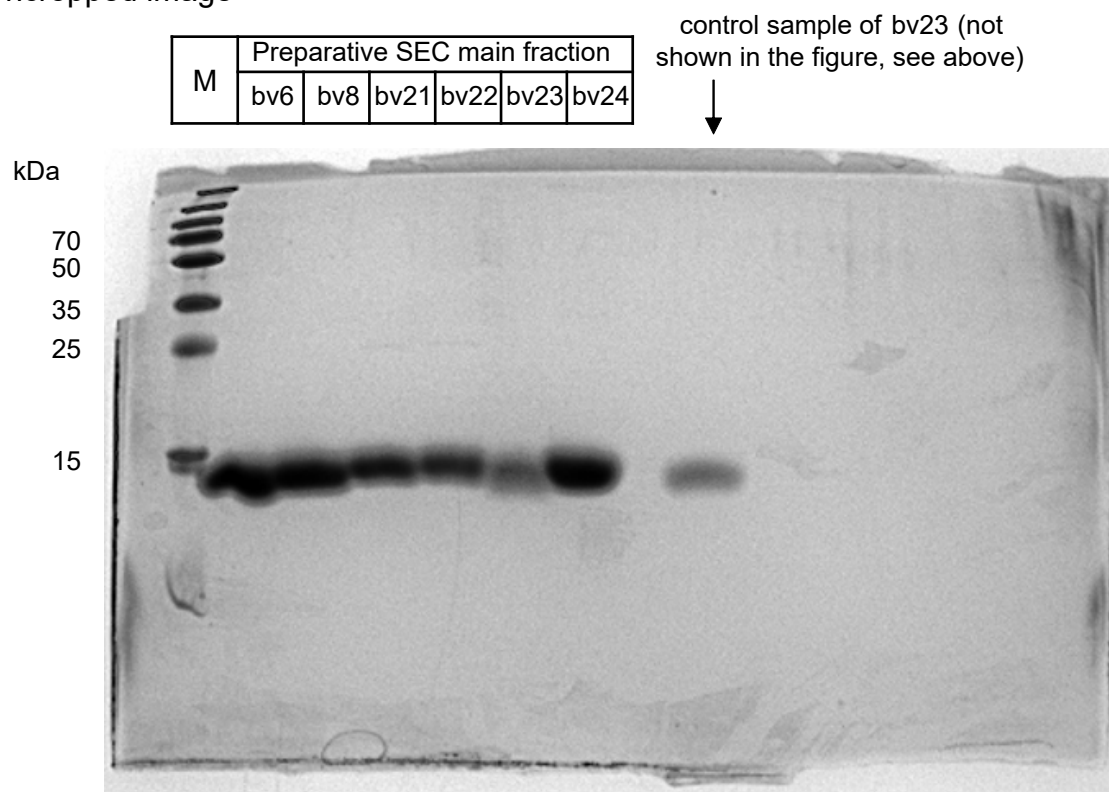

Supplement: pbio.3002883.s003.pdf [file pbio.3002883.s003.pdf]
